# Supplementary material for: C5a Increases the Injury to Primary Neurons Elicited by Fibrillar Amyloid Beta
Source: PubMed Central journal article supplement (PMC5298486; doi:10.1177/1759091416687871), 2017-01-01
Supplement: ASN687871_supplemental_figures.pdf [file ASN687871_supplemental_figures.pdf]

## Supplemental Figures for C5a Increases the Injury to Primary Neurons Elicited By Fibrillar Amyloid Beta

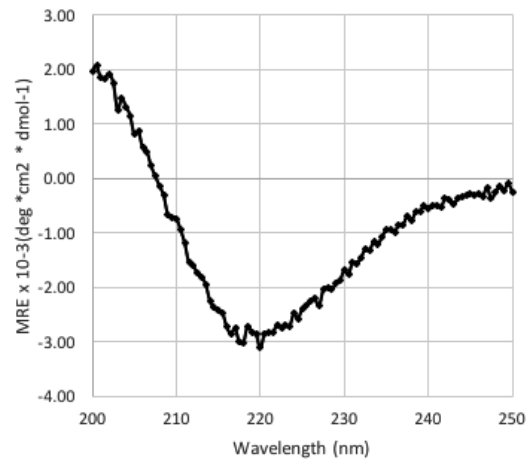

**Supplemental Figure S1.** Circular dichroism of amyloid beta preparation confirms beta sheet structure.

Amyloid beta peptide incubated for 20-24 hours shows minima at 218nm, indicative of  $\beta$ -sheet structure.

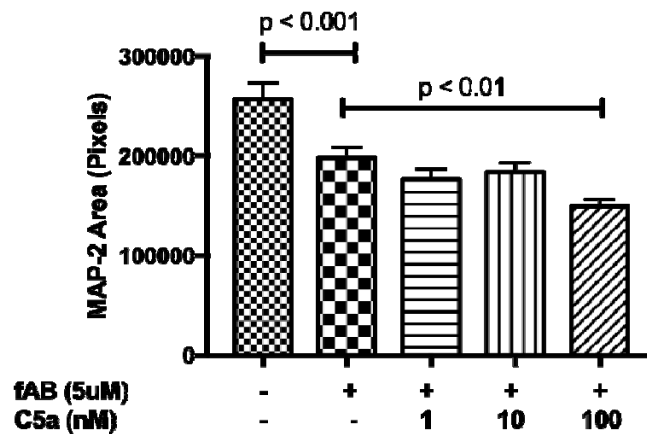

**Supplemental Figure S2.** C5a at a concentration of 100 nM increases MAP-2 loss in the presence of fA $\beta$ .

Primary neurons from WT mice were generated using E15-E16 pups and cultured for 7-10 days. The cells were then stimulated with 5  $\mu$ M fA $\beta$  and 1, 10 or 100 nM hC5a for 24 hours. MAP-2 was visualized by immunocytochemistry (20x magnification) and quantified using ImageJ software as described in Materials and Methods. Data are presented as mean  $\pm$  SEM. n = 3 independent experiments, each with 3 coverslips per treatment, 3 images per coverslip. p values are calculated using One-way ANOVA, uncorrected Fisher's LSD test. Values of p < 0.05 were considered statistically significant.

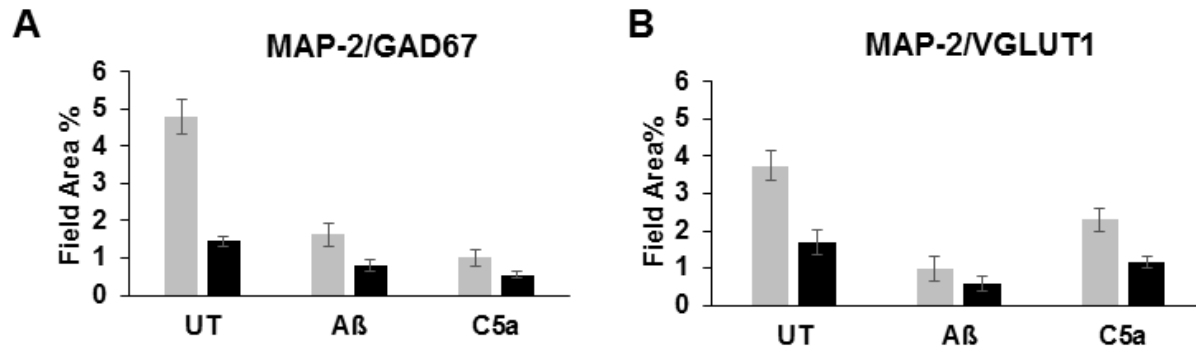

**Supplemental Figure S3.** fA $\beta$  and C5a kill both GABAergic and glutamatergic neurons in culture.

Quantification of the immunostaining of MAP-2 (grey bars) (A,B) and GAD67 (black bars) (A) or VGLUT1 (black bars) (B) in 7days cultures untreated or treated with 5 uM fA $\beta$  or C5a (100 uM). Bars represent the average of 5-7 images per coverslip (n=3) per condition +/- SEM.
